# Supplementary material for: A consensus and saturated genetic map provides insight into genome anchoring, synteny of Solanaceae and leaf- and fruit-related QTLs in wolfberry (Lycium Linn.)
Source: Research Square preprint supplement (doi:10.21203/rs.3.rs-409699/v1), 2021-04-20
Supplement: Supplementary file 1 [file 09770b72759afb0021843876.xlsx]

## Sheet: Sheet1
Table 4 Highdensity genetic map-assisted genome assembly
Index	Anchored	Oriented	Unplaced
Unique mapped makers	12442	10540	2162
Makers per Mb	10.3	10.9	3.2
Scaffolds	1643	1044	783254
Scaffolds with 1 anchored marker	336	0	104
Scaffolds with 2 anchored marker	111	77	187
Scaffolds with 3 anchored marker	167	110	70
Scaffolds with ≥4 anchored marker	1029	857	181
Total bases (bp)	1208281949	963551338	670115130
Mapping rate (%)	64.3	51.3	35.7
